# Supplementary material for: Less is more: Enterobactin concentration dependency in copper tolerance and toxicity
Source: Frontiers journal article supplement (doi:10.3389/fmolb.2022.961917), 2022-08-16
Supplement: Image_1.pdf [file Image_1.pdf]

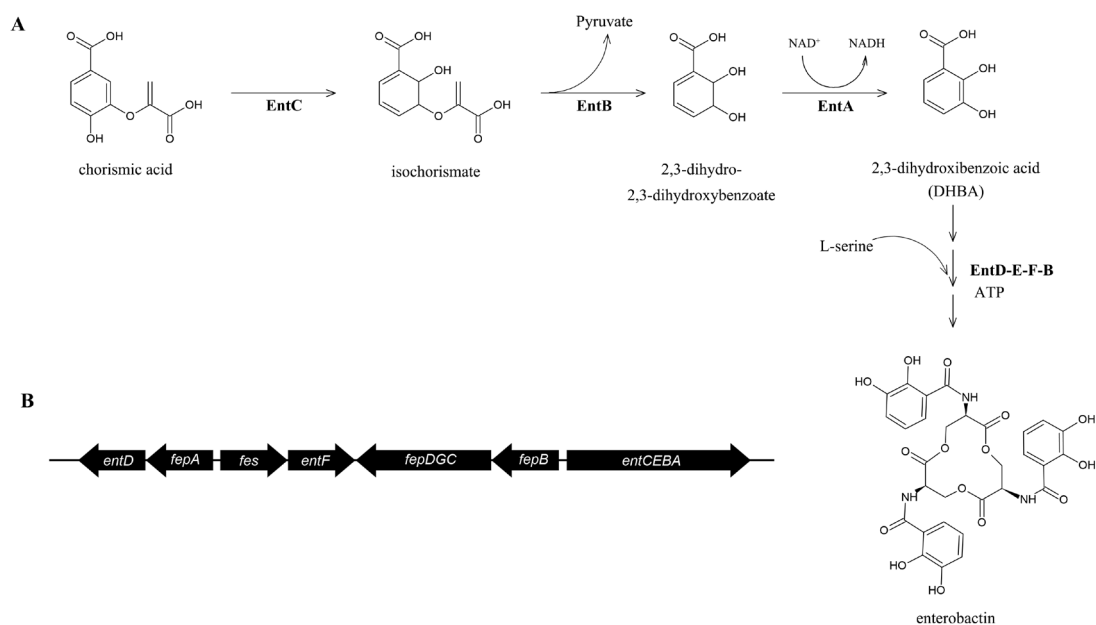

**Figure S1. A) Enterobactin biosynthetic pathway in *Escherichia coli*. B) Enterobactin gene cluster including synthesis and uptake operons.**

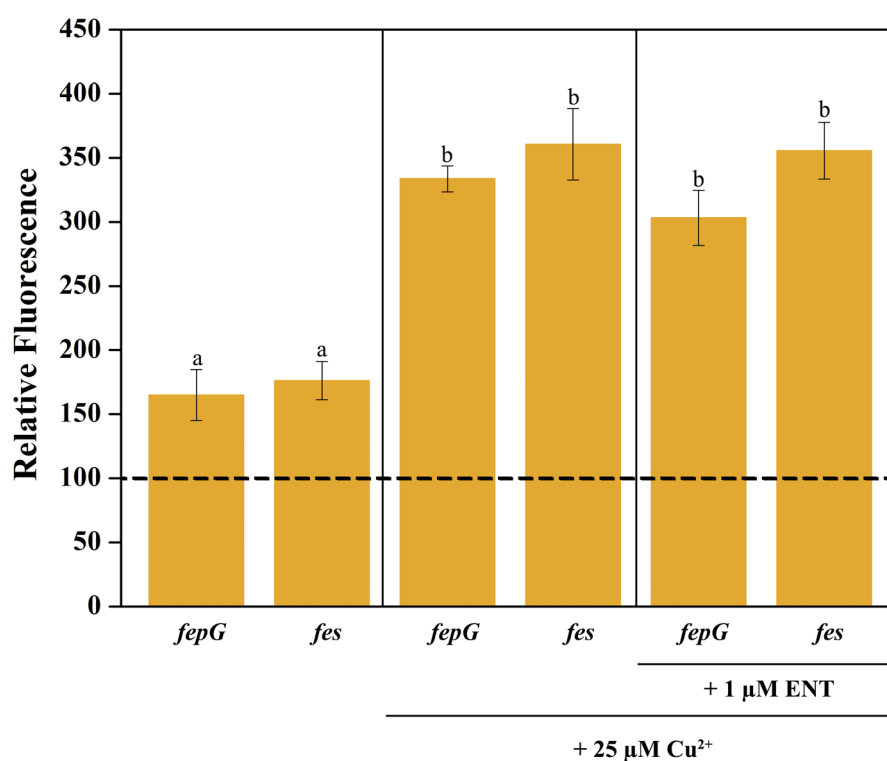

**Figure S2. Measurement of reactive oxygen species levels in *E. coli* fepG and fes strains. Impact of copper and enterobactin addition. Determination of reactive oxygen**

species (ROS) levels in *E. coli* *fepG* and *fes* strains, grown in M9 with no copper added (left panel), with 25  $\mu$ M of CuSO<sub>4</sub> (central panel) and, with 25  $\mu$ M CuSO<sub>4</sub> plus 1  $\mu$ M of enterobactin (right panel). Results are expressed as relative fluorescence to that of the control corresponding to WT strain (dotted line) grown in M9 medium. Values are means  $\pm$  SD for three independent experiments. Statistically significant differences between any two conditions compared are indicated with different letters ( $P < 0.05$ ). Same letters indicate no statistically significant difference.
